# Supplementary material
Source: Research Square preprint supplement (doi:10.21203/rs.3.rs-9370549/v2)
Supplement: Supplementary file 1 [file 99d28befeb8b35d4fc348fd4.pdf]

# Supplementary Material for: Zero-Downtime Hardening of Legacy Patient Identifiers Against Transcription Errors: A Table-Free Verhoeff Formulation

Csaba Balogh

## ONLINE RESOURCE 1: WORKED EXAMPLE

Let the TAJ be  $\mathbf{t} = (0, 7, 6, 5, 4, 3, 2, 1, 0)$  in right-to-left order (i.e. the printed form is 012345670). We trace the TAJ-FC computation step by step.

| $i$ | $t_i$ | $\pi_{i+1}(t_i)$ | $S$ after $\text{Mul}(S, \varphi(\pi_{i+1}(t_i)))$ | Note                                     |
|-----|-------|------------------|----------------------------------------------------|------------------------------------------|
| 0   | 0     | 1                | (1, 0)                                             | $\varphi(1) = (1, 0)$                    |
| 1   | 7     | 5                | (1, 1)                                             | $\varphi(5) = (0, 1)$                    |
| 2   | 6     | 5                | (1, 0)                                             | $\varphi(5) = (0, 1)$                    |
| 3   | 5     | 3                | (4, 0)                                             | $\varphi(3) = (3, 0)$                    |
| 4   | 4     | 7                | (1, 1)                                             | $\varphi(7) = (2, 1)$                    |
| 5   | 3     | 5                | (1, 0)                                             | $\varphi(5) = (0, 1)$                    |
| 6   | 2     | 9                | (0, 1)                                             | $\varphi(9) = (4, 1)$                    |
| 7   | 1     | 5                | (0, 0)                                             | $\varphi(5) = (0, 1)$ ; back to identity |
| 8   | 0     | 5                | (0, 1)                                             | $\varphi(5) = (0, 1)$ ; final state      |

Partial fold:  $F_{+1} = (0, 1)$ . Inverse:  $(0, 1)^{-1} = (0, 1)$  (a reflection is its own inverse). TAJ-FC:  $\varphi^{-1}(0, 1) = 0 + 5 = 5$ .

The receiver, given TAJ = 012345670 and TAJ-FC = 5, places the digit 5 at position 0 and folds the ten-digit sequence; the result is (0, 0), confirming validity.

Now suppose positions 4 and 5 (right-to-left) are transposed, changing the printed TAJ from 012345670 to 012354670. Recomputing the partial fold with the altered input yields  $F_{+1} = (0, 0)$  and therefore TAJ-FC = 0  $\neq$  5, triggering the hard stop.

## ONLINE RESOURCE 2: REFERENCE PSEUDOCODE

The two listings below translate the algebraic definitions into executable form. The group operations reduce to modulo-5 arithmetic plus a single XOR; the position-dependent permutation  $\pi_i$  uses two constant vectors  $\rho$ ,  $\rho^{-1}$  and modulo-10 arithmetic.

**Listing 1:** Primitive operations on  $S = \mathbb{Z}_5 \times \mathbb{Z}_2$  and the cycle-conjugate permutation  $\pi_i$ .

```
constant rho      := [0, 1, 4, 3, 8, 9, 6, 7, 2, 5]
constant rho_inv := [0, 1, 8, 3, 2, 9, 6, 7, 4, 5]

function Mul((a,b), (c,d)):
  sign := +1 if b = 0, else -1
  return ( (a + sign * c) mod 5,  b XOR d )

function Inv((a,b)):
  if b = 0: return ( (-a) mod 5, 0 )
  else:    return ( a, 1 )

function Phi(d):
  if d < 5: return (d, 0)
  else:    return (d - 5, 1)

function PhiInv((a,b)):
  if b = 0: return a
  else:    return a + 5
```

```

function Pi(d, i):                                -- position permutation
  x := rho_inv[d]
  y := (x + i) mod 10
  return rho[y]

```

**Listing 2:** TAJ-FC computation and vTAJ validation.

```

function ComputeTAJFC(t[0..8]):
  -- t[0] = rightmost digit
  S := (0, 0)                                     -- identity
  for i from 0 to 8:
    S := Mul(S, Phi(Pi(t[i], i + 1)))
  return PhiInv(Inv(S))

function ValidateVTAJ(t[0..8], k):
  -- k = received TAJ-FC
  S := (0, 0)
  S := Mul(S, Phi(Pi(k, 0)))                       -- position 0: TAJ-FC
  for i from 0 to 8:
    S := Mul(S, Phi(Pi(t[i], i + 1)))
  return S = (0, 0)

```

### ONLINE RESOURCE 3: ADDITIONAL MONTE CARLO DATA

Table S1 reports detection rates from the  $n = 8,000$  pilot run. Results are consistent with the  $n = 150,000$  run reported in the main text (Table I).

TABLE I  
\*

Table S1: Detection rates from Monte Carlo runs with  $n = 8,000$  trials per configuration (seed 1). Wilson 95% intervals in the last two

|          | Error model         | Codeword family   | $n$  | Det. | Rate   | $CI_{low}$ | $CI_{high}$ |
|----------|---------------------|-------------------|------|------|--------|------------|-------------|
|          | Single-digit subst. | legacy mod-10 (9) | 8000 | 8000 | 1.0000 | 0.9995     | 1.0000      |
|          | Single-digit subst. | fold explicit (9) | 8000 | 8000 | 1.0000 | 0.9995     | 1.0000      |
|          | Adjacent transpos.  | legacy mod-10 (9) | 8000 | 7059 | 0.8824 | 0.8751     | 0.8893      |
| columns. | Adjacent transpos.  | fold explicit (9) | 8000 | 8000 | 1.0000 | 0.9995     | 1.0000      |
|          | Random noise        | legacy mod-10 (9) | 8000 | 7543 | 0.9429 | 0.9376     | 0.9478      |
|          | Random noise        | fold explicit (9) | 8000 | 8000 | 1.0000 | 0.9995     | 1.0000      |
|          | Single-digit subst. | full vTAJ (10)    | 8000 | 8000 | 1.0000 | 0.9995     | 1.0000      |
|          | Adjacent transpos.  | full vTAJ (10)    | 8000 | 8000 | 1.0000 | 0.9995     | 1.0000      |
|          | Random noise        | full vTAJ (10)    | 8000 | 8000 | 1.0000 | 0.9995     | 1.0000      |

Figure S1 shows the convergence of Monte Carlo estimates between the two sample sizes. Point estimates are stable; Wilson intervals narrow by a factor of  $\sqrt{150,000/8,000} \approx 4.3$ , as expected from standard sampling theory.

Monte Carlo stability: same configuration at two sample sizes (95% Wilson intervals)

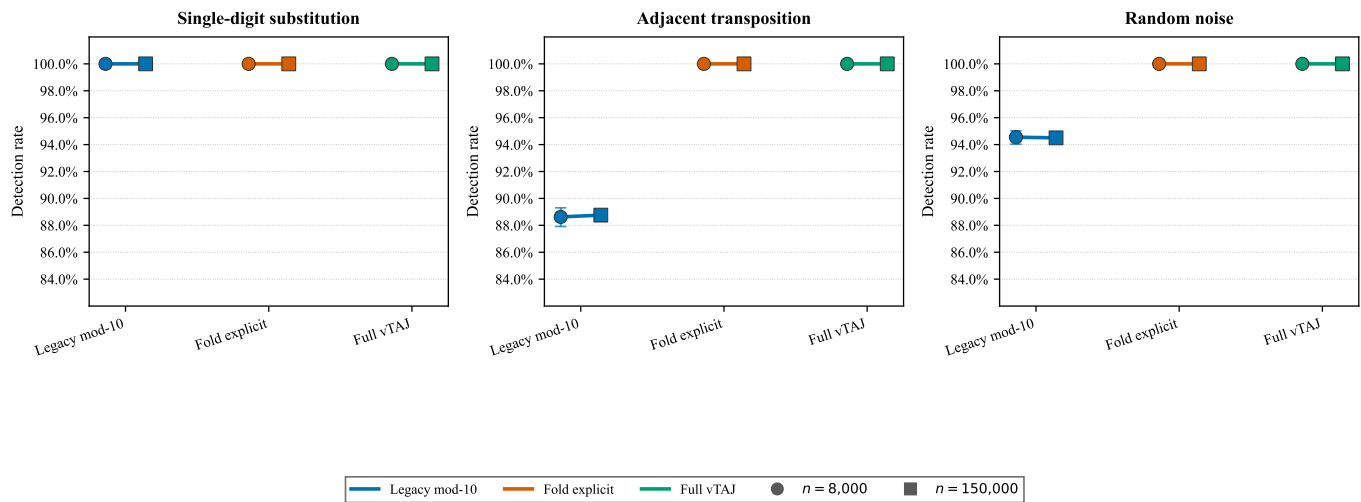

Fig. 1. \*

Figure S1: Convergence of Monte Carlo estimates between  $n = 8,000$  (circles) and  $n = 150,000$  (squares). Thin horizontal ticks show Wilson 95% interval endpoints.
